# Supplementary material for: Prediction of Drug-Target Interactions and Drug Repositioning via Network-Based Inference
Source: PLOS journal article supplement (doi:10.1371/journal.pcbi.1002503), 2012-05-10
Supplement: S9 (10.1371/journal.pcbi.1002503.s009) [file journal.pcbi.1002503.s009]

**Table S3.** Recall on the valid recommendation list length for all data sets with the network-based inference (NBI) method by 30 simulation times of 10-fold cross-validation test.

| Datasets | Enzyme | Ion Channel | GPCRs | Nuclear Receptor | Approved | Global |
|----------|--------|-------------|-------|------------------|----------|--------|
| Recall   | 0.935  | 0.981       | 0.948 | 0.851            | 0.741    | 0.736  |

Approved: data set of approved small molecular drugs in DrugBank, global: data set of approved and experimentally investigated small molecular drugs in DrugBank.
