# Supplementary material for: Prediction of Drug-Target Interactions and Drug Repositioning via Network-Based Inference
Source: PLOS journal article supplement (doi:10.1371/journal.pcbi.1002503), 2012-05-10
Supplement: S11 (10.1371/journal.pcbi.1002503.s011) [file journal.pcbi.1002503.s011]

**Table S5.** The agonistic and antagonistic activities profiles of approved small drugs for estrogen receptor  $\alpha$  by yeast two-hybrid system-based assay. To evaluate the agonistic or antagonistic activities of the compounds, a yeast two-hybrid system for ER was constructed by yeast co-transformation with pGBKT7-ER $\alpha$ / $\beta$ LBD and pGADT7-SRC1 according to the lithium acetate method. The detailed description can be found in the section of **Material and methods**. The concentration of compounds is 10  $\mu$ M with DMSO solution.

| DrugBank ID & Drug Name             | Agonistic activities (10 $\mu$ M) | Inhibitive ratio % (10 $\mu$ M) |
|-------------------------------------|-----------------------------------|---------------------------------|
| DMSO                                | 1                                 | 0                               |
| E2 (1 nM)                           | 13.07                             | --                              |
| DB00622<br>(Nicardipine)            | 0.962                             | 15.21                           |
| DB01100<br>(Pimozide)               | 0.955                             | 4.58                            |
| DB00836<br>(Loperamide)             | 0.934                             | 6.18                            |
| DB01124<br>(Tolbutamide)            | 0.966                             | 23.77                           |
| DB01085<br>(Pilocarpine HCl)        | 1.008                             | 7.72                            |
| DB00501<br>(Cimetidine)             | 1.018                             | 2.4                             |
| DB00909<br>(Zonisamide)             | 0.97                              | 0.67                            |
| DB01200<br>(Bromocriptine mesylate) | 1.034                             | 3.36                            |
| DB01026<br>(Ketoconazole)           | 1.05                              | 42.91                           |
| DB00752<br>(Tranlycypromine)        | 0.988                             | 4.3                             |
| <b>DB00641<br/>(Simvastatin)</b>    | 1.38                              | <b>60.4</b>                     |
| DB01259<br>(Lapatinib)              | 0.995                             | 14.01                           |
| DB01217<br>(Anastrozole)            | 0.965                             | 0                               |
| DB01128<br>(Bicalutamide)           | 1.007                             | 11.66                           |

**Table S5.** Continue...

---

|                                           |              |              |
|-------------------------------------------|--------------|--------------|
| DB00357<br>(Dl-aminoglutethimide)         | 0.956        | 0            |
| <b>DB00586</b><br><b>(Diclofenac, Na)</b> | 1.046        | <b>63.49</b> |
| DB00741<br>(Hydrocortisone)               | 0.959        | 0.7          |
| <b>DB01167</b><br><b>(Itraconazole)</b>   | <b>4.132</b> | <b>8.19</b>  |
| DB00834<br>(Mifepristone)                 | 1.463        | 0            |

---
