# Supplementary material for: Prediction of Drug-Target Interactions and Drug Repositioning via Network-Based Inference
Source: PLoS Comput Biol. 2012 May 10;8(5):e1002503. doi: 10.1371/journal.pcbi.1002503 (PMC3349722; doi:10.1371/journal.pcbi.1002503)
Supplement: Table S1 — Statistic results of all known drug-target interaction (DTI) data sets used in this study. (PDF) [file pcbi.1002503.s007.pdf]

## SUPPLEMENTARY MATERIAL

### Prediction of Drug-Target Interactions and Drug Repositioning via Network-Based Inference

Feixiong Cheng<sup>†,§</sup>, Chuang Liu<sup>†,§</sup>, Jing Jiang<sup>†</sup>, Weiqiang Lu<sup>†</sup>, Weihua Li<sup>†</sup>, Guixia Liu<sup>†</sup>,

Weixing Zhou<sup>†,\*</sup>, Jin Huang<sup>†,\*</sup>, and Yun Tang<sup>†,\*</sup>

<sup>§</sup>These authors contributed equally to this work.

\*To whom correspondence should be addressed.

For W. Zhou. Tel.: +86-21-6425-3634; Fax: +86-21-6425-3152. E-mail: [wxzhou@ecust.edu.cn](mailto:wxzhou@ecust.edu.cn)

For J. Huang. Tel.: +86-21-6425-3681; Fax: +86-21-6425-3681; E-mail: [huangjin@ecust.edu.cn](mailto:huangjin@ecust.edu.cn)

For Y. Tang. Tel: +86-21-6425-1052; Fax, +86-21-6425-3651. E-mail: [ytang234@ecust.edu.cn](mailto:ytang234@ecust.edu.cn)

**Table S1** Statistic of all known drug-target interactions network used in this study.

| data set       | enzyme | ion channel | GPCRs | nuclear receptor | Approved | Global |
|----------------|--------|-------------|-------|------------------|----------|--------|
| N <sub>d</sub> | 445    | 210         | 223   | 54               | 1,120    | 4,398  |
| N <sub>t</sub> | 664    | 204         | 95    | 26               | 1,112    | 3,801  |
| N <sub>i</sub> | 2,926  | 1,476       | 635   | 90               | 2,988    | 12,483 |
| Sparsity (%)   | 1.02   | 3.45        | 3.0   | 6.41             | 0.24     | 0.075  |

N<sub>d</sub> is the number of the drugs, N<sub>t</sub> is the number of the targets, N<sub>i</sub> is the total number of the drug-target interactions, and sparsity is the proportion of the known drug-target interactions over all the possible interactions, approved: data set of approved small molecular drugs in DrugBank, global: data set of approved and experimentally investigated small molecular drugs in DrugBank.
