# Supplementary material for: Prediction of Drug-Target Interactions and Drug Repositioning via Network-Based Inference
Source: PLoS Comput Biol. 2012 May 10;8(5):e1002503. doi: 10.1371/journal.pcbi.1002503 (PMC3349722; doi:10.1371/journal.pcbi.1002503)
Supplement: Table S2 — The performance of the area under receiver operating characteristic (AUC) for four benchmark data sets using three different methods by simulation 30 times of 10-fold cross validation test. (PDF) [file pcbi.1002503.s008.pdf]

**Table S2.** The mean AUC for four benchmark datasets by 30 simulation times of 10-fold cross-validation test.

| Methods | enzyme      | Ion channel | GPCRs       | Nuclear receptor |
|---------|-------------|-------------|-------------|------------------|
| DBSI    | 0.781±0.018 | 0.709±0.025 | 0.755±0.033 | 0.789±0.084      |
| TBSI    | 0.903±0.016 | 0.905±0.018 | 0.745±0.044 | 0.528±0.139      |
| NBI     | 0.975±0.006 | 0.976±0.007 | 0.946±0.019 | 0.838±0.087      |

The AUC (ROC score) is the area under the receiver operating characteristic (ROC) curve.

DBSI: Drug-Based Similarity Inference, TBSI: Target-Based Similarity Inference, NBI: Network-based Inference. The mean  $\pm$  SD (standard deviation) was yielded by 30 simulation times of 10-fold cross-validation test.
