# Supplementary material for: Prediction of Drug-Target Interactions and Drug Repositioning via Network-Based Inference
Source: PLoS Comput Biol. 2012 May 10;8(5):e1002503. doi: 10.1371/journal.pcbi.1002503 (PMC3349722; doi:10.1371/journal.pcbi.1002503)
Supplement: Table S4 — The inhibitory activities of 9 approved drugs on dipeptidyl peptidase-IV. (PDF) [file pcbi.1002503.s010.pdf]

**Table S4.** The inhibitive activities profiles of nine approved drugs for dipeptidyl peptidase-IV (DPP-IV) enzyme inhibition assay. The inhibitory effects of compounds on human recombinant DPP4 was determined using a DPP-IV Drug Discovery Kit (Biomol, USA) according to the manufacturer's instructions. The DPP-IV Drug Discovery Kit is a complete assay system designed to screen DPP4 small molecule inhibitors. The fluorimetric assay is based on the cleavage of 7-amino-4-methylcoumarin (AMC) moiety from peptide substrate (H-Gly-Pro-AMC), which increases its fluorescence intensity at 460 nm. Compounds dilutions were prepared from stock in DMSO and diluted with assay buffer for inhibition assay. A 40  $\mu$ L solution of DPP-IV enzyme in assay buffer was incubated with 10  $\mu$ L of various concentrations of test compound solutions for 10 min at room temperature. The reaction was initiated by the addition of 50  $\mu$ L of H-Gly-Pro-AMC with a final concentration of 5  $\mu$ M. The activity of DPP4 was detected in a Synergy™ 2 Multi-Mode Microplate Reader (BioTek) at an excitation wavelength of 380 nm and an emission wavelength of 460 nm. P32/98 (10  $\mu$ M) was used as a positive compound. IC<sub>50</sub> values were determined by using the GraphPad Prism 4 software with three independent determinations.

| DrugBank ID<br>& Drug Name       | Inhibition Ratio (%) to DPP-IV | IC <sub>50</sub> ( $\mu$ M) |
|----------------------------------|--------------------------------|-----------------------------|
| DB00622<br>(Nicardipine)         | 21.24                          | ---                         |
| DB00227<br>(Lovastatin)          | 9.49                           | ---                         |
| <b>DB00471<br/>(Montelukast)</b> | <b>49.7</b>                    | <b>9.79</b>                 |
| DB01026<br>(Ketoconazole)        | 14.95                          | ---                         |
| DB00641<br>(Simvastatin)         | 16.27                          | ---                         |
| DB01259<br>(Lapatinib)           | 39.64                          | ---                         |
| DB01132<br>(Pioglitazone)        | 18.63                          | ---                         |
| DB00564<br>(Carbamazepine)       | 19.67                          | ---                         |
| DB01241<br>(Gemfibrozil)         | 17.35                          | ---                         |
| Positive Compounds<br>(P32/98)   | 98.38 (2 $\mu$ M)              | 98.38 (2 $\mu$ M)           |
